# Supplementary material for: A transferable machine-learning scheme from pure metals to alloys for predicting adsorption energies
Source: Royal Society of Chemistry journal article supplement (doi:10.1039/d1ta09184k), 2021-11-30
Supplement: d1ta09184k1.pdf [file d1ta09184k1.pdf]

## Supporting Information

### **A Transferable Machine-learning Scheme from Pure Metals to Alloys in Predicting Adsorption Energies**

Xin Li<sup>a</sup>, Bo Li<sup>a</sup>, Ze Yang<sup>a</sup>, Zhiwen Chen<sup>b</sup>, Wang Gao<sup>\*a</sup>, and Qing Jiang<sup>a</sup>

<sup>a</sup>Key Laboratory of Automobile Materials, Ministry of Education, Department of Materials Science and Engineering, Jilin University 130022, Changchun, China.

<sup>b</sup>Department of Materials Science and Engineering, University of Toronto, Toronto, ON, M5S, 3E4, Canada.

**Note S1: A database of adsorption energies for machine learning models.**

Among the considered datasets, pure transition metals (TMs) contain Ag, Au, Cu, Pt, Pd, Ir, Ni, Rh and Ru, single-atom alloys (SAAs) contain Ag@Cu, Au@Ni, Pt@Rh and Pd@Ir, and AB intermetallics (ABs) contain AgAu, AgPt, PtRh and IrRu, which are from reference 1. We consider the (100) facet with 2 adsorption sites, the (110) facet with 4 sites, the (111) facet with 3 sites and (211) facets with 12 sites. Each metallic adsorption systems contain six adsorbates of C, CH, CO, H, O and OH. For the high-entropy alloys (HEAs) with the adsorbate of OH on IrPdPtRhRu, we consider the (100) facet with 1 bridge site, (110) facet with 2 bridge sites, (111) facet with 1 bridge site, (211) facet with 3 bridge sites and (532) facet with 6 bridge sites, which are all from reference 2. The considered adsorption sites are shown in Figure S1. For the case of the interchanges of nearest-neighboring atoms on HEAs, we consider the HEA structures with the adsorption sites of RhRh, PtPt and PdIr. For the TM nanoparticles (NPs) from reference 3, the data contain three morphologies of Cube, Cuboctahedron and Icosahedron as well as three sizes of 55-, 147- and 172-atoms, with three adsorbates of CH<sub>3</sub>, CO and OH. The structures are shown in Figure S2. The datasets on TMs with adatoms come from reference <sup>4</sup>, which include (100), (111), (211) facets and three adsorbates of CH<sub>3</sub>, CO and OH.

**Note S2: A Python script for determining the adsorption sites and active sites of targeted structures and calculating the corresponding descriptors.**

We design a Python script to make it easy for users to obtain a large number of descriptors of the targeted structures. Based on the package of Atoms Simulation Environment (ASE)<sup>5</sup>, this script is used for identifying the adsorption sites and active sites of the targeted structures built for Material Studio, VASP and other accessible files or softwares supported by ASE. The script determines the nearest neighboring atoms by collision sphere detection for ASE, namely given a number of spheres of the different radius located at the different points, it calculates the pairs of spheres that overlap. We use this detection to identify the neighboring atoms and coordination numbers. Taking the given package as an example, we input the Trajectory files that include the structure information. The script first identifies the adsorbates and substrates by searching every atoms and then determine the atoms at adsorption site and nearest neighbor according to the position of the adsorbates. Based on the collected information of active centers, the  $\psi$ ,  $\overline{CN}$  and their coupling terms are calculated.

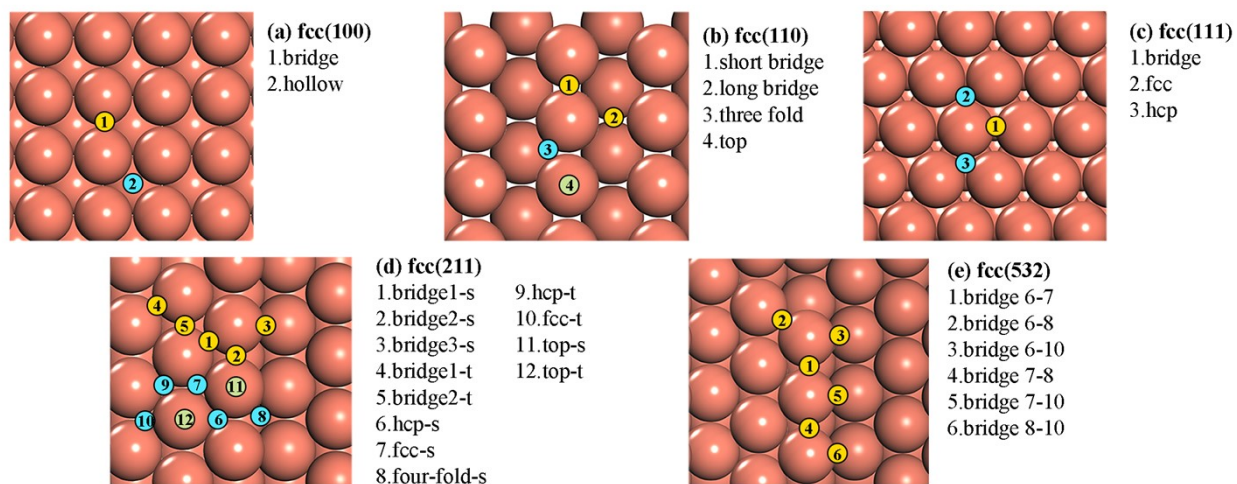

**Figure S1.** Overview of structures used for the considered adsorption sites on (a) the (100) facet, (b) the (110) facet, (c) the (111) facet, (d) the (211) facet and (e) the (532) facet.

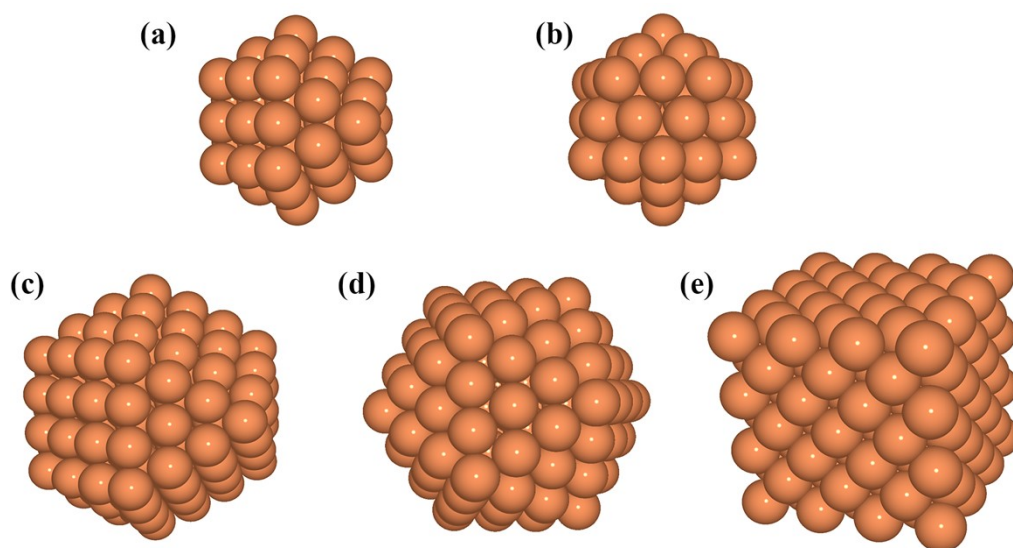

**Figure S2.** The structures of nanoparticles. (a) 55-atom Cuboctahedron. (b) 55-atom Icosahedron. (c) 147-atom Cuboctahedron. (d)147-atom Icosahedron. (e)172-atom Cube.

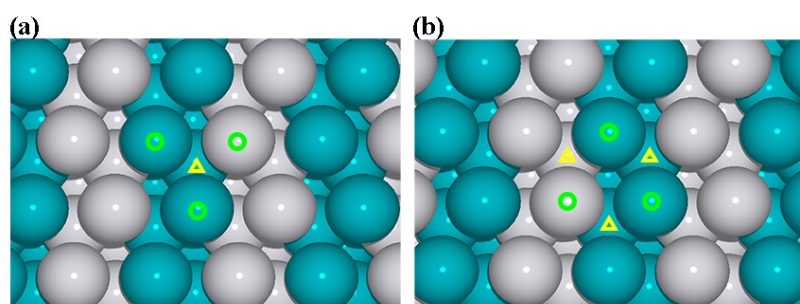

**Figure S3.** The central atoms (the adsorption sites, represented by the green empty circles) and the atoms with more bonding numbers with central atoms (the atoms in category  $C_2$ , represented by the yellow empty triangles) for fcc (a) and hcp (b) site.

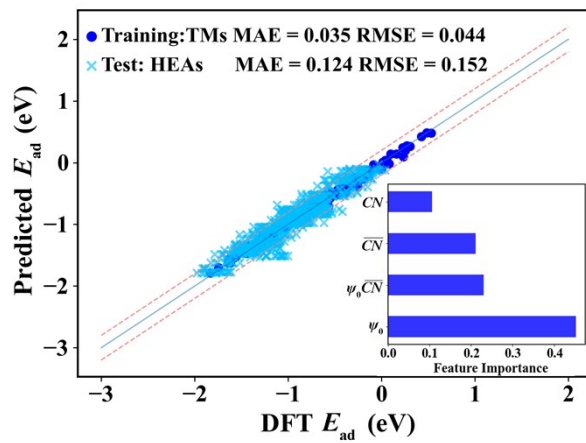

**Figure S4.** The transferability of our models in predicting the adsorption energies of HEAs by training the data of TMs only based on four descriptors  $\psi_0$ ,  $\overline{CN}$ ,  $CN$  and  $\psi_0 \overline{CN}$ .

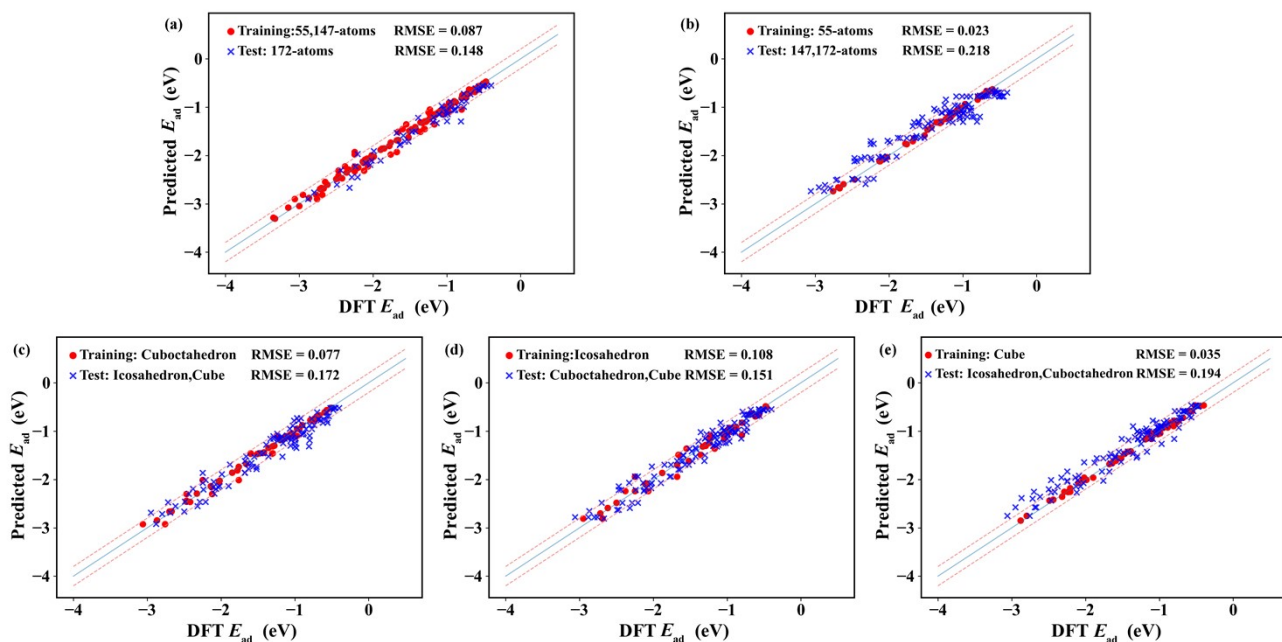

**Figure S5.** The mutual predictions for different sizes and morphologies of nanoparticles (NPs). (a) shows the performance to predict the adsorption energies of 172-atoms NPs by training the properties of 55- and 147-atoms clusters. (b) shows the performance to predict the adsorption energies of the 147- and 172-atoms NPs by training the properties of 55-atoms NPs. (c), (d) and (e) shows the performance to predict the adsorption energies of two types of NPs by training the properties of only one types of NPs.

**Supplementary Table S1.** The results of ML model on the datasets of TMs, SAAs and ABs with various training sizes. The training scores and test scores are obtained based on 5-fold cross-validation (CV). The 5-fold CV scores and 10-fold CV scores on the training sets are also listed.

| Training Sizes | Training Scores | Test Scores | 5-fold CV Scores | 10-fold CV Scores |
|----------------|-----------------|-------------|------------------|-------------------|
| 5%             | 1.000           | 0.714       | 0.588            | 0.253             |
| 10%            | 1.000           | 0.819       | 0.752            | 0.737             |
| 15%            | 0.999           | 0.874       | 0.839            | 0.839             |
| 20%            | 0.999           | 0.913       | 0.887            | 0.894             |
| 25%            | 0.998           | 0.940       | 0.914            | 0.921             |
| 30%            | 0.997           | 0.952       | 0.925            | 0.932             |
| 35%            | 0.997           | 0.960       | 0.944            | 0.950             |
| 40%            | 0.997           | 0.965       | 0.952            | 0.956             |
| 45%            | 0.997           | 0.969       | 0.959            | 0.963             |
| 50%            | 0.997           | 0.973       | 0.965            | 0.967             |
| 55%            | 0.997           | 0.974       | 0.968            | 0.971             |
| 60%            | 0.997           | 0.976       | 0.971            | 0.973             |
| 65%            | 0.997           | 0.978       | 0.974            | 0.975             |
| 70%            | 0.997           | 0.979       | 0.975            | 0.977             |
| 75%            | 0.998           | 0.981       | 0.976            | 0.978             |
| 80%            | 0.997           | 0.981       | 0.978            | 0.979             |
| 85%            | 0.998           | 0.982       | 0.979            | 0.980             |
| 90%            | 0.998           | 0.983       | 0.980            | 0.981             |
| 95%            | 0.998           | 0.984       | 0.981            | 0.982             |

**Supplementary Table S2.** The results of ML model on the datasets of HEAs with various training sizes. The training scores and test scores are obtained based on 5-fold cross-validation (CV). The 5-fold CV scores and 10-fold CV scores on the training sets are also listed.

| Training Sizes | Training Scores | Test Scores | 5-fold CV | 10-fold CV |
|----------------|-----------------|-------------|-----------|------------|
| 5%             | 0.998           | 0.893       | 0.860     | 0.828      |
| 10%            | 0.996           | 0.927       | 0.912     | 0.907      |
| 15%            | 0.993           | 0.940       | 0.931     | 0.929      |
| 20%            | 0.990           | 0.948       | 0.939     | 0.939      |
| 25%            | 0.988           | 0.952       | 0.946     | 0.946      |
| 30%            | 0.986           | 0.954       | 0.950     | 0.950      |
| 35%            | 0.985           | 0.956       | 0.953     | 0.954      |
| 40%            | 0.983           | 0.958       | 0.954     | 0.954      |
| 45%            | 0.982           | 0.958       | 0.956     | 0.956      |
| 50%            | 0.981           | 0.960       | 0.957     | 0.957      |
| 55%            | 0.981           | 0.960       | 0.958     | 0.959      |
| 60%            | 0.980           | 0.961       | 0.959     | 0.959      |
| 65%            | 0.979           | 0.961       | 0.960     | 0.960      |
| 70%            | 0.979           | 0.963       | 0.960     | 0.960      |
| 75%            | 0.978           | 0.962       | 0.961     | 0.961      |
| 80%            | 0.978           | 0.963       | 0.961     | 0.961      |
| 85%            | 0.977           | 0.963       | 0.962     | 0.962      |
| 90%            | 0.977           | 0.963       | 0.962     | 0.962      |
| 95%            | 0.977           | 0.962       | 0.962     | 0.963      |

**Supplementary Table S3.** Comparison between the DFT-calculated  $\Delta E_{\text{ad}}$  and the predicted  $\Delta E_{\text{ad}}$  by our machine learning scheme for CO. Cu(100) is selected as the reference to calculate  $\Delta E_{\text{ad}}$ .

| Alloys     | Predicted $\Delta E_{\text{ad}}$ (eV) | DFT-calculated $\Delta E_{\text{ad}}$ (eV) | Error (eV) |
|------------|---------------------------------------|--------------------------------------------|------------|
| Cu@Ag(211) | 0.002                                 | -0.102                                     | 0.104      |
| Cu@Au(211) | -0.043                                | -0.083                                     | 0.040      |
| Cu(100)    | 0                                     | 0.014                                      | 0.014      |
| Cu@Ni(211) | -0.089                                | -0.157                                     | 0.068      |
| Cu@Ir(211) | -0.128                                | -0.120                                     | 0.008      |
| Cu@Pd(211) | 0.022                                 | -0.210                                     | 0.232      |
| Cu@Pt(211) | -0.037                                | -0.172                                     | 0.135      |
| Cu@Rh(211) | 0.022                                 | -0.141                                     | 0.163      |
| CuAg(211)  | -0.089                                | -0.090                                     | 0.001      |
| CuAu(211)  | -0.017                                | -0.059                                     | 0.042      |
| CuIr(211)  | 0.009                                 | -0.062                                     | 0.071      |
| CuPd(211)  | -0.095                                | -0.198                                     | 0.103      |
| CuPt(211)  | 0.015                                 | -0.138                                     | 0.153      |
| CuRh(211)  | -0.095                                | -0.169                                     | 0.074      |
| HEA(100)-1 | -0.007                                | -0.025                                     | 0.018      |
| HEA(100)-2 | -0.007                                | -0.128                                     | 0.119      |
| HEA(100)-3 | -0.007                                | -0.027                                     | 0.020      |
| HEA(100)-4 | -0.007                                | -0.031                                     | 0.024      |
| HEA(100)-5 | -0.007                                | 0.004                                      | 0.011      |

## References

1. M. Andersen; S. V. Levchenko; M. Scheffler; K. Reuter, *Acs Catal.* 2019, **9**, 2752-2759.
2. Z. L. Lu; Z. W. Chen; C. V. Singh, *Matter* 2020, **3**, 1318-1333.
3. J. Dean; M. G. Taylor; G. Mpourmpakis, *Sci. Adv.* 2019, **5**, eaax5101.
4. L. T. Roling; F. Abild-Pedersen, *Chemcatchem* 2018, **10**, 1643-1650.
5. A. H. Larsen; J. J. Mortensen; J. Blomqvist; I. E. Castelli; R. Christensen; M. Dulak; J. Friis; M. N. Groves; B. Hammer; C. Hargus; E. D. Hermes; P. C. Jennings; P. B. Jensen; J. Kermode; J. R. Kitchin; E. L. Kolsbjerg; J. Kubal; K. Kaasbjerg; S. Lysgaard; J. B. Maronsson; T. Maxson; T. Olsen; L. Pastewka; A. Peterson; C. Rostgaard; J. Schiotz; O. Schutt; M. Strange; K. S. Thygesen; T. Vegge; L. Vilhelmsen; M. Walter; Z. H. Zeng; K. W. Jacobsen, *J. Phys-Condens. Mat.* 2017, **29**, 273002-273032.
